# Supplementary material for: Bacterial whole genome-based phylogeny: construction of a new benchmarking dataset and assessment of some existing methods
Source: PubMed Central journal article supplement (PMC5217230; doi:10.1186/s12864-016-3407-6), 2017-01-05

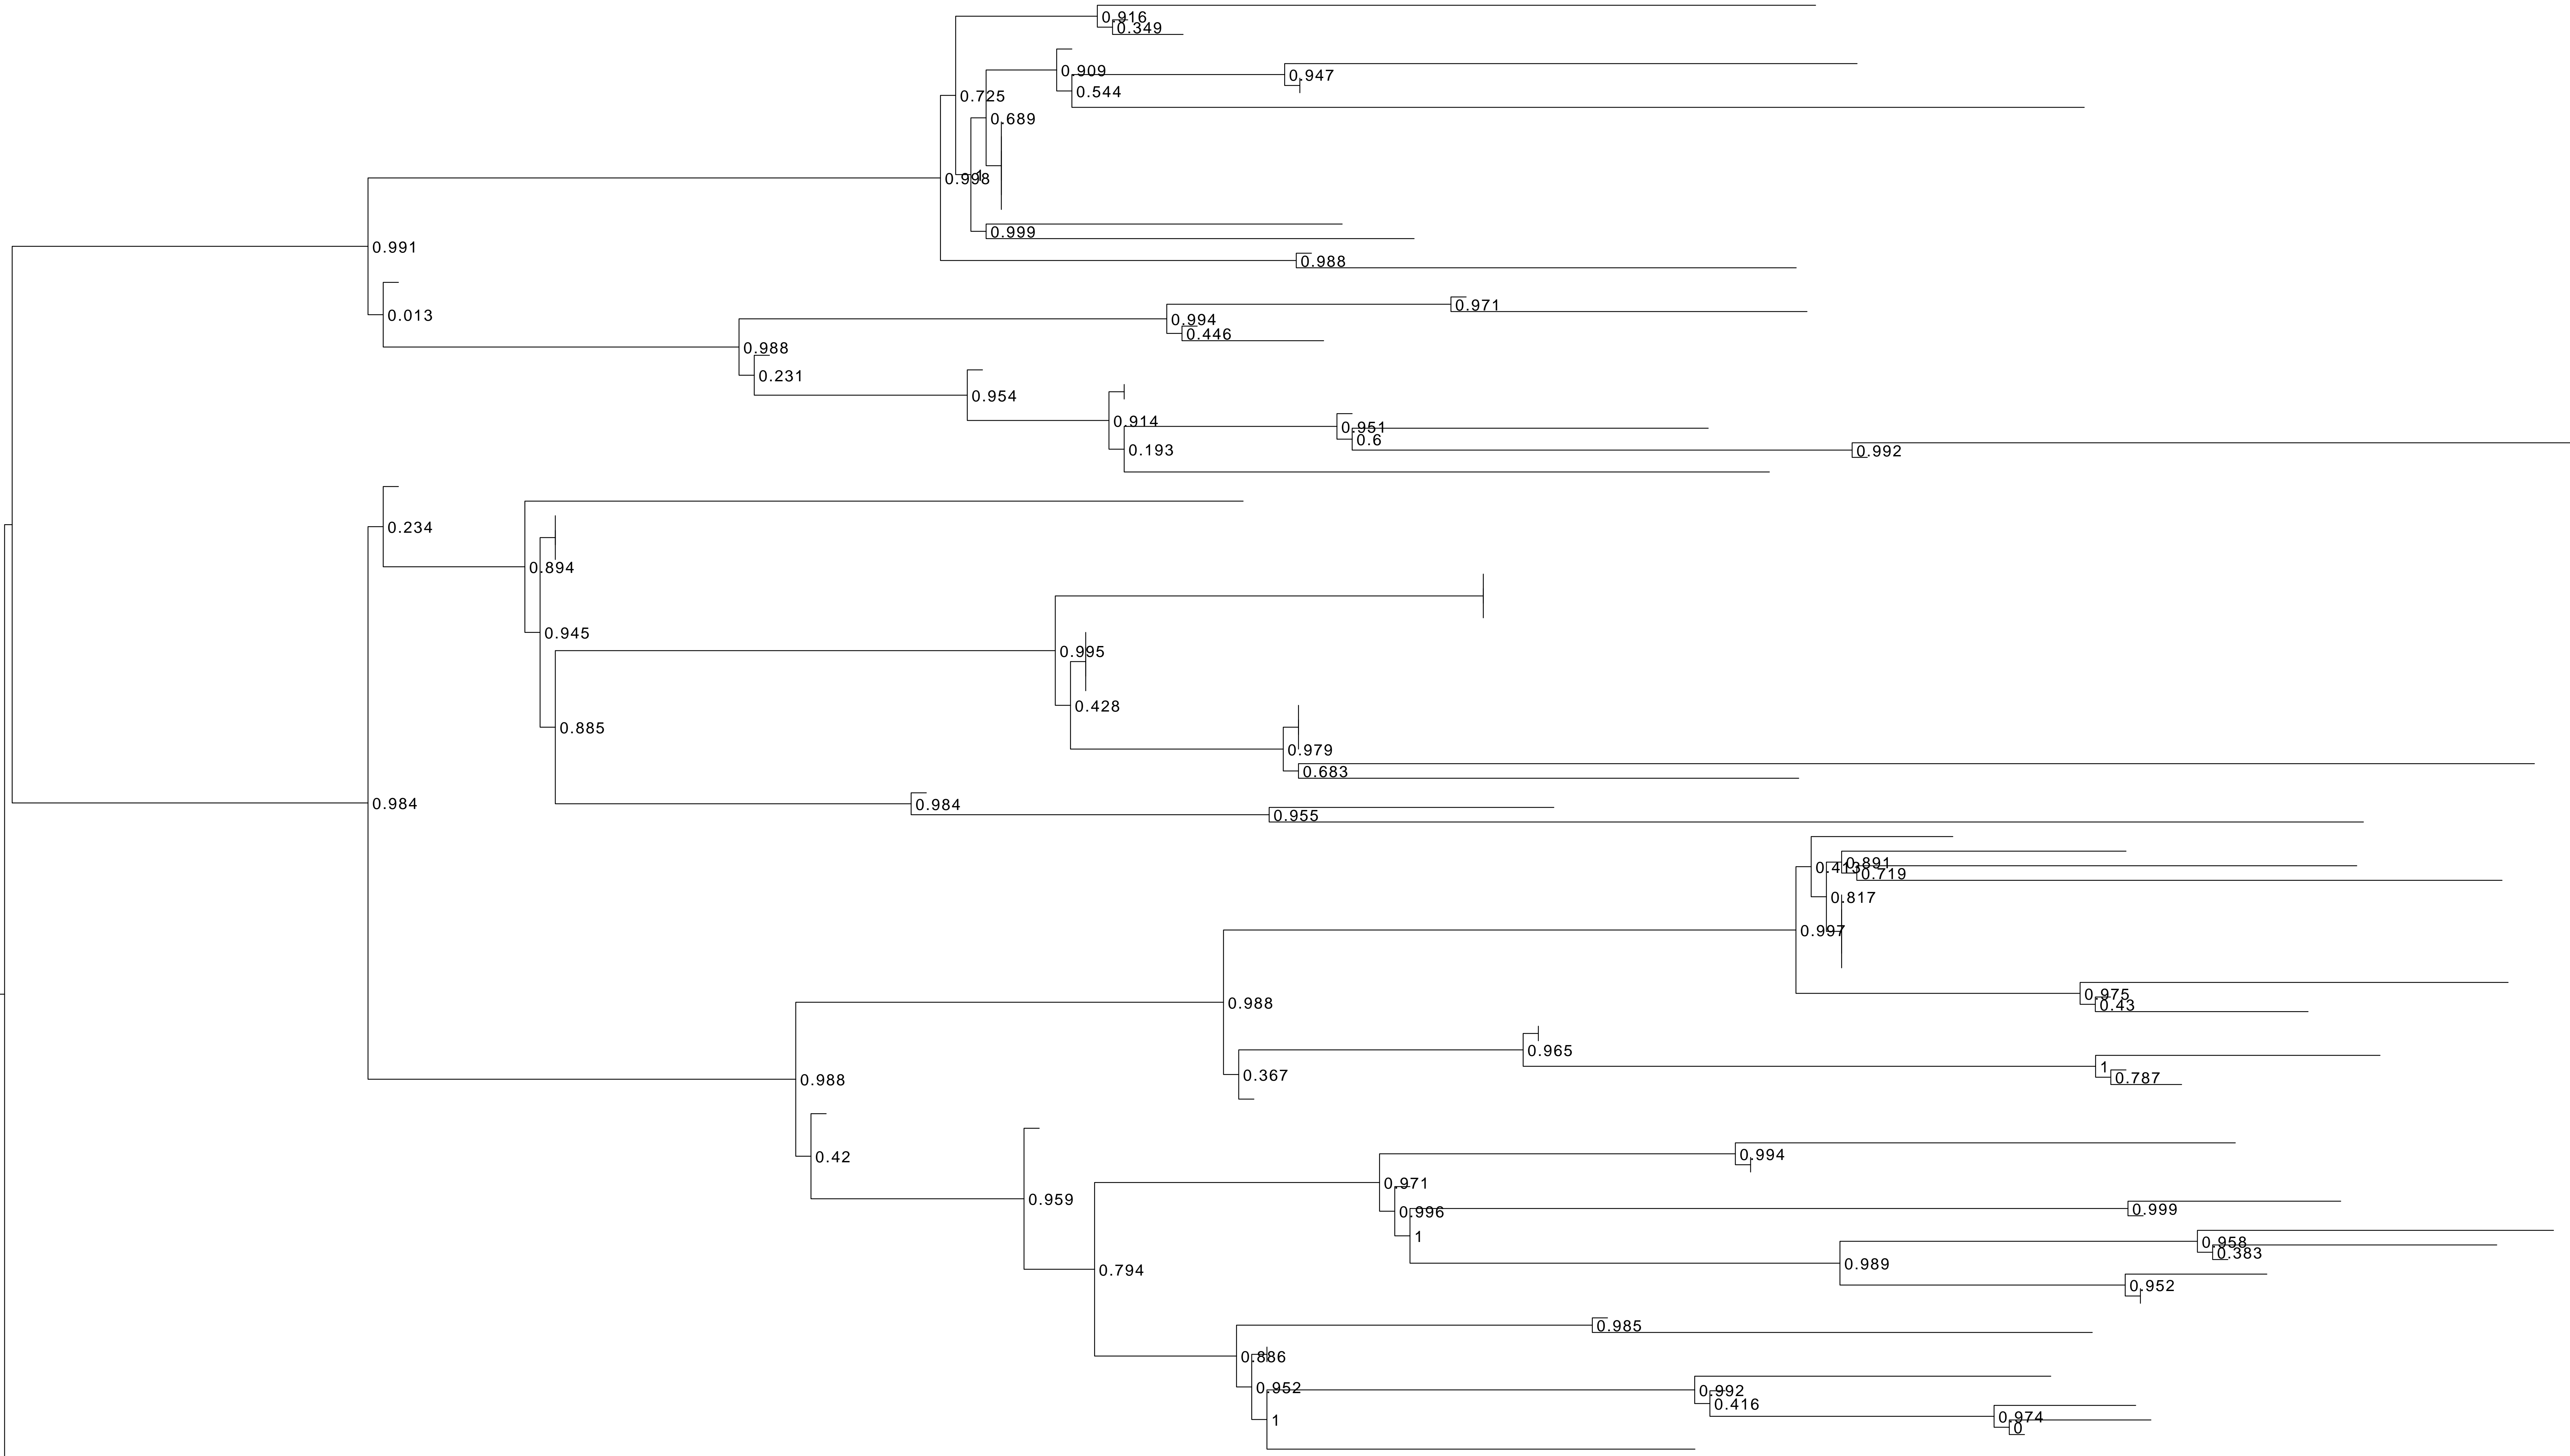

Supplement: 12864_2016_3407_MOESM11_ESM.pdf [file 12864_2016_3407_MOESM11_ESM.pdf]
